# Supplementary material for: Beyond genome-wide scan: Association of a cis-regulatory NCR3 variant with mild malaria in a population living in the Republic of Congo
Source: PLOS journal article supplement (doi:10.1371/journal.pone.0187818), 2017-11-09
Supplement: S2 (10.1371/journal.pone.0187818.s002) [file journal.pone.0187818.s002]

**Table S2. Proportion of mild malaria episodes according to rs2736191 polymorphism in children < 5 years old**

| Genotype | Number of mild malaria episodes |            |           |           |           |          | Total      |
|----------|---------------------------------|------------|-----------|-----------|-----------|----------|------------|
|          | 0                               | 1          | 2         | 3         | 4         | 5        |            |
| GG       | 46 (54.8%)                      | 29 (50%)   | 6 (46.2%) | 4 (44.4%) | 3 (75%)   | 1 (100%) | 89 (52.7%) |
| GC       | 28 (33.3%)                      | 23 (39.7%) | 7 (53.8%) | 4 (44.4%) | 1 (25.0%) | 0 (0%)   | 63 (37.3%) |
| CC       | 10 (11.9%)                      | 6 (10.3%)  | 0 (0%)    | 1 (11.1%) | 0 (0%)    | 0 (0%)   | 17 (10.1%) |
| Total    | 84 (100%)                       | 58 (100%)  | 13 (100%) | 9 (100%)  | 4 (100%)  | 1 (100%) | 169 (100%) |
